# Supplementary material
Source: PubMed Central journal article supplement (PMC3773815)

100 200 300 400 500 600 700 800 900 1000

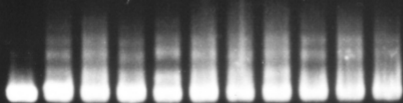

Supplement: emboj2013169df1.pdf [file emboj2013169df1.pdf]

full col metl-3 ddm1 (2nd) ddc (3 line) rdr2 (2 line) rdr1, 2, 6 (3 lines) nrpd1 (3 lines) rpd1 (3 lines)

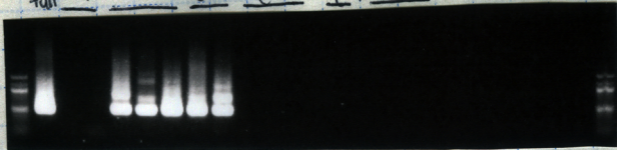

Supplement: emboj2013169dfs14.pdf [file emboj2013169dfs14.pdf]

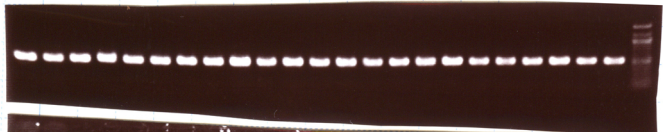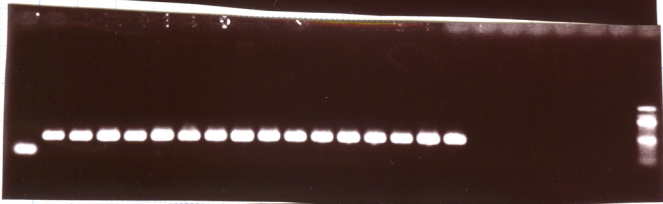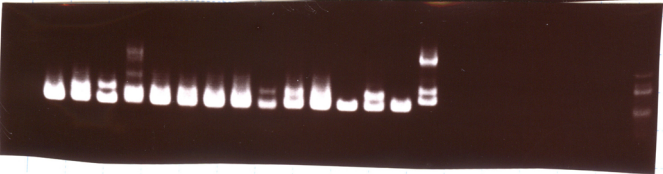

Supplement: emboj2013169dfs6.pdf [file emboj2013169dfs6.pdf]
